# Supplementary material for: Investigating the causal effect of Dickkopf-1 on coronary artery disease and ischemic stroke: a Mendelian randomization study
Source: Aging (Albany NY). 2023 Sep 22;15(18):9797–808. doi: 10.18632/aging.205050 (PMC10564415; doi:10.18632/aging.205050)
Supplement: Supplementary Table 2 [file aging-15-205050-s002.xls]

## Sheet: Sheet1
Supplementary Table 2. Harmonized dataset after instrumental variables selection and two-sample Mendelian randomization analysis for the effect of exposure and outcome.
exposures	outcome	SNP	effect/otherallele	Beta exposure	EAF exposure	SE exposure	P value exposure	Beta outcome	EAF outcome	SE outcome	P value outcome	R2	IV SE	F-statistic
DKK1	CAD	rs10469741	G/A	-0.2004	0.0349	0.0422	2.08e-06	-0.009848	0.034731	0.0267148	0.7124	0.00103538	0.000481112	22.5512
DKK1	CAD	rs1149769	C/G	0.0779	0.6384	0.0113	6.7e-12	0.007613	0.62738	0.0099547	0.44441	0.00217947	0.000331605	47.5246
DKK1	CAD	rs11594179	T/C	0.0685	0.2101	0.0125	4.67e-08	0.0296	0.189846	0.0121707	0.0150124	0.0013783	0.00041699	30.0304
DKK1	CAD	rs1159798	C/A	0.122	0.7656	0.0142	7.65e-18	0.020177	0.734962	0.0116253	0.0826342	0.00338106	0.000266238	73.8147
DKK1	CAD	rs11603211	A/G	0.0921	0.0867	0.0193	1.73e-06	0.037838	0.099075	0.0150536	0.0119525	0.00104552	0.000478775	22.7722
DKK1	CAD	rs11770907	A/G	-0.0573	0.5263	0.0106	6.4e-08	-0.00045	0.489363	0.0093605	0.961657	0.00134121	0.000422716	29.2212
DKK1	CAD	rs12041331	A/G	-0.1133	0.0921	0.0203	2.36e-08	0.002597	0.147011	0.0133667	0.845949	0.00142964	0.000409433	31.1507
DKK1	CAD	rs142947703	G/A	-0.2889	0.0138	0.0629	4.33e-06	-0.052913	0.010479	0.0607077	0.383426	0.000968621	0.000497416	21.0957
DKK1	CAD	rs1613662	A/G	0.0801	0.8488	0.0142	1.75e-08	0.022984	0.809934	0.012754	0.0715286	0.00146028	0.000405116	31.8191
DKK1	CAD	rs1768584	G/A	0.0508	0.3883	0.0108	2.73e-06	-3.7e-05	0.330411	0.0101839	0.997101	0.00101583	0.000485721	22.1248
DKK1	CAD	rs215225	G/A	-0.0499	0.4158	0.0106	2.31e-06	0.001038	0.419334	0.0093963	0.912038	0.00101749	0.000485325	22.161
DKK1	CAD	rs2167973	C/A	-0.0851	0.1205	0.0168	4.46e-07	0.012632	0.133566	0.0137327	0.357653	0.0011779	0.000451068	25.659
DKK1	CAD	rs4541868	A/C	-0.1437	0.2471	0.0124	4.05e-31	-0.030567	0.245678	0.0115211	0.00797462	0.00613449	0.000197655	134.298
DKK1	CAD	rs566028	C/T	-0.0531	0.4769	0.0113	2.67e-06	0.000209	0.473832	0.0093409	0.982149	0.00101385	0.000486195	22.0817
DKK1	CAD	rs61990064	G/A	-0.0684	0.1733	0.0146	2.97e-06	0.008506	0.160708	0.013144	0.51754	0.00100774	0.000487665	21.9486
DKK1	CAD	rs7024581	G/A	0.1498	0.0355	0.0309	1.27e-06	-0.012047	0.035491	0.0284518	0.67199	0.00107899	0.000471289	23.5021
DKK1	CAD	rs73007094	G/A	0.0578	0.3779	0.0117	8.4e-07	-0.004404	0.389357	0.0097244	0.650633	0.00112041	0.000462496	24.4053
DKK1	CAD	rs7898709	G/T	0.2271	0.1144	0.0178	1.93e-37	0.005155	0.123582	0.0140271	0.713244	0.00742572	0.00017965	162.777
DKK1	CAD	rs8045833	A/G	0.0768	0.2713	0.0135	1.25e-08	0.005898	0.294226	0.0122576	0.630394	0.00148522	0.0004017	32.3635
DKK1	CAD	rs938182	A/G	0.0559	0.5913	0.011	3.96e-07	0.000638	0.593476	0.00977	0.947934	0.00118551	0.000449619	25.8249
DKK1	IS	rs10469741	G/A	-0.2004	0.0349	0.0422	2.08e-06	-0.0194	0.04162	0.0377	0.6075	0.00103538	0.000672802	22.5512
DKK1	IS	rs1149769	C/G	0.0779	0.6384	0.0113	6.7e-12	0.021	0.6122	0.0155	0.1751	0.00217947	0.000463727	47.5246
DKK1	IS	rs11594179	T/C	0.0685	0.2101	0.0125	4.67e-08	-0.0126	0.1764	0.0198	0.5221	0.0013783	0.000583131	30.0304
DKK1	IS	rs1159798	C/A	0.122	0.7656	0.0142	7.65e-18	-0.0102	0.7494	0.0176	0.562	0.00338106	0.000372316	73.8147
DKK1	IS	rs11603211	A/G	0.0921	0.0867	0.0193	1.73e-06	-0.0004	0.09575	0.0257	0.988	0.00104552	0.000669533	22.7722
DKK1	IS	rs11770907	A/G	-0.0573	0.5263	0.0106	6.4e-08	-0.0007	0.5358	0.0151	0.9646	0.00134121	0.00059114	29.2212
DKK1	IS	rs12041331	A/G	-0.1133	0.0921	0.0203	2.36e-08	0.0451	0.0539	0.0337	0.1797	0.00142964	0.000572564	31.1507
DKK1	IS	rs142291089	T/C	-0.2378	0.0174	0.0513	3.51e-06	0.1158	0.01765	0.0582	0.0466101	0.0009866	0.000689235	21.4877
DKK1	IS	rs145525247	C/T	-0.4232	0.0097	0.0788	7.75e-08	-0.1089	0.01564	0.063	0.0838398	0.00132387	0.000594998	28.8429
DKK1	IS	rs1613662	A/G	0.0801	0.8488	0.0142	1.75e-08	0.0541	0.8789	0.0231	0.0190498	0.00146028	0.000566527	31.8191
DKK1	IS	rs1768584	G/A	0.0508	0.3883	0.0108	2.73e-06	0.0148	0.4267	0.0152	0.3314	0.00101583	0.000679248	22.1248
DKK1	IS	rs193255470	T/C	0.2586	0.0177	0.056	3.91e-06	0.0269	0.02905	0.0457	0.5553	0.000979121	0.000691862	21.3246
DKK1	IS	rs215225	G/A	-0.0499	0.4158	0.0106	2.31e-06	-0.0058	0.3721	0.0156	0.7086	0.00101749	0.000678694	22.161
DKK1	IS	rs2167973	C/A	-0.0851	0.1205	0.0168	4.46e-07	-0.0149	0.07182	0.0292	0.610299	0.0011779	0.000630787	25.659
DKK1	IS	rs4541868	A/C	-0.1437	0.2471	0.0124	4.05e-31	-0.041	0.226	0.0181	0.0232702	0.00613449	0.000276407	134.298
DKK1	IS	rs556864429	T/C	-0.1776	0.0481	0.0378	2.6e-06	-0.0112	0.0532	0.0338	0.739701	0.00101354	0.000680012	22.0751
DKK1	IS	rs566028	C/T	-0.0531	0.4769	0.0113	2.67e-06	-0.0302	0.4891	0.0151	0.0458005	0.00101385	0.00067991	22.0817
DKK1	IS	rs61990064	G/A	-0.0684	0.1733	0.0146	2.97e-06	-0.0015	0.2304	0.0178	0.932	0.00100774	0.000681967	21.9486
DKK1	IS	rs7024581	G/A	0.1498	0.0355	0.0309	1.27e-06	-0.0019	0.05022	0.0345	0.9552	0.00107899	0.000659065	23.5021
DKK1	IS	rs73007094	G/A	0.0578	0.3779	0.0117	8.4e-07	-0.0071	0.4079	0.0154	0.6459	0.00112041	0.000646768	24.4053
DKK1	IS	rs7898709	G/T	0.2271	0.1144	0.0178	1.93e-37	0.0076	0.1291	0.0225	0.734301	0.00742572	0.000251228	162.777
DKK1	IS	rs8045833	A/G	0.0768	0.2713	0.0135	1.25e-08	0.0192	0.2171	0.0183	0.2926	0.00148522	0.00056175	32.3635
DKK1	IS	rs938182	A/G	0.0559	0.5913	0.011	3.96e-07	-0.0027	0.6234	0.0155	0.8611	0.00118551	0.000628761	25.8249
SNP, Single nucleotide polymorphism; SE, Standard error; EAF, effect allele frequency; IV, instrumental variables.
