# Supplementary material for: Investigating the causal effect of Dickkopf-1 on coronary artery disease and ischemic stroke: a Mendelian randomization study
Source: Aging (Albany NY). 2023 Sep 22;15(18):9797–808. doi: 10.18632/aging.205050 (PMC10564415; doi:10.18632/aging.205050)
Supplement: Supplementary Table 3 [file aging-15-205050-s003.xls]

## Sheet: Sheet1
Supplementary Table 3. Two sample Mendelian randomization estimations results with eight methods.
exposures	outcome	method	number SNP	Beta	lower CI	upper CI	Standard error	OR	OR lower CI	OR upper CI	P value
DKK1	CAD	MR Egger	20	0.111539292144876	-0.0229170243619893	0.245995608651742	0.0686001614830947	1.11799767166901	0.97734357611567	1.27889395746066	0.121343318486178
DKK1	CAD	Inverse variance weighted	20	0.083508443816135	0.0234362955246142	0.143580592107656	0.0306490552507759	1.08709439447931	1.0237130835644	1.15439984257463	0.00643665323983873
DKK1	CAD	Maximum likelihood	20	0.0860548382690975	0.027621118692638	0.144488557845557	0.0298131222328875	1.08986609303651	1.02800611832434	1.15544847406822	0.00389583436041278
DKK1	CAD	Simple median	20	0.0170562446779767	-0.0751088925967662	0.10922138195272	0.0470230292218076	1.01720253294523	0.927642467431398	1.11540925448922	0.716813239423381
DKK1	CAD	Weighted median	20	0.0367440623473944	-0.0506720167769695	0.124160141471758	0.0446000403695734	1.03742747010594	0.950590397111315	1.13219716820302	0.410020727776718
DKK1	CAD	Penalised weighted median	20	0.0317123759597467	-0.0548217457431585	0.118246497662652	0.044150062093319	1.03222057115336	0.946653877998122	1.12552151559905	0.472580898340913
DKK1	CAD	Simple mode	20	0.00144606443389528	-0.155875004370098	0.158767133237889	0.0802658514306088	1.00144711048923	0.855666138214805	1.17206497992265	0.985813985855878
DKK1	CAD	Weighted mode	20	0.0202908648814402	-0.095639304061041	0.136221033823921	0.0591480453788169	1.02049812392848	0.908791754453391	1.14593515603355	0.73532568735447
DKK1	IS	MR Egger	23	0.049597112938075	-0.121266020028949	0.220460245905099	0.0871750678403185	1.05084763816136	0.885798288161345	1.24665036429623	0.575433951817338
DKK1	IS	Inverse variance weighted	23	0.091249071204544	0.00431752453012954	0.178180617878958	0.0443528299359257	1.09554183920503	1.0043268584675	1.19504114754051	0.0396530553105881
DKK1	IS	Maximum likelihood	23	0.0946203523538643	0.0111726249396038	0.178068079768125	0.0425753711297247	1.09924145146837	1.01123527180622	1.1949066674346	0.0262549412298009
DKK1	IS	Simple median	23	0.0630630630630631	-0.0647847948083183	0.190910920934444	0.0652284989139701	1.06509400520386	0.937269146861366	1.21035163028682	0.333642872258291
DKK1	IS	Weighted median	23	0.0581086566362789	-0.0607116758082766	0.176928989080834	0.060622618594161	1.059830147033	0.941094540985644	1.19354633529547	0.337795088814787
DKK1	IS	Penalised weighted median	23	0.0586175230326046	-0.0588164965241332	0.176051542589342	0.0599153161003764	1.06036959622278	0.942879774999065	1.19249952157981	0.327906418108531
DKK1	IS	Simple mode	23	0.0434403453193332	-0.171735796285666	0.258616486924333	0.109783745716836	1.04439768924301	0.842201656582621	1.29513700759283	0.696144733313749
DKK1	IS	Weighted mode	23	0.0434403453193332	-0.122995740779522	0.209876431418188	0.0849163704585996	1.04439768924301	0.884267428842741	1.23352562552671	0.614051228395536
DKK1, dickkopf-1; CAD, coronary artery disease; IS, ischemic stroke; OR, odds ratio; SNP, single nucleotide polymorphism
