# Supplementary material for: Investigating the causal effect of Dickkopf-1 on coronary artery disease and ischemic stroke: a Mendelian randomization study
Source: Aging (Albany NY). 2023 Sep 22;15(18):9797–808. doi: 10.18632/aging.205050 (PMC10564415; doi:10.18632/aging.205050)
Supplement: Supplementary Table 4 [file aging-15-205050-s004.xls]

## Sheet: Sheet1
Supplementary Table 4. Two sample Mendelian randomization estimations results with eight methods.
exposures	outcome	method	number SNP	Beta	lower CI	upper CI	Standard error	OR	OR lower CI	OR upper CI	P value
CAD	DKK1	MR Egger	88	-0.0164764957620807	-0.100701360105632	0.0677483685814703	0.0429718695630362	0.983658499262362	0.904203023664323	1.07009600482191	0.70235076456036
CAD	DKK1	Inverse variance weighted	88	-0.0148455489274186	-0.050858417721191	0.0211673198663537	0.0183739126498839	0.985264102949341	0.950413222676979	1.02139293667056	0.419108519024796
CAD	DKK1	Maximum likelihood	88	-0.0149597382602991	-0.0513371096454418	0.0214176331248437	0.0185598833597667	0.985151602721999	0.949958376416884	1.02164863686597	0.420228177205507
CAD	DKK1	Simple median	88	-0.0212044597336626	-0.0767329476521125	0.0343240281847873	0.0283308611828826	0.9790187741869	0.926137147684549	1.03491989561884	0.454183948725441
CAD	DKK1	Weighted median	88	-0.00228276056215832	-0.0598911080406283	0.0553255869163116	0.0293920140196275	0.997719842954289	0.941867089753247	1.05688466648253	0.938093729590604
CAD	DKK1	Penalised weighted median	88	-0.00028884078282741	-0.0583177833852601	0.0577401018196053	0.0296066033685881	0.999711200927656	0.943350118804804	1.05943961349838	0.992215995111249
CAD	DKK1	Simple mode	88	-0.0124665295650165	-0.155024829849149	0.130091770719116	0.0727338266755779	0.987610855705627	0.856393913087944	1.13893289921999	0.86430781026172
CAD	DKK1	Weighted mode	88	0.0173056392176257	-0.075543591060594	0.110154869495845	0.0473720562643978	1.01745624933909	0.927239310308064	1.11645096126828	0.71576423949123
IS	DKK1	MR Egger	15	0.269413974625982	0.0270599646086989	0.511767984643265	0.123650005110859	1.30919700321988	1.02742941031889	1.66823800839799	0.0483375740092899
IS	DKK1	Inverse variance weighted	15	-0.00862333346930761	-0.108082739855385	0.0908360729167696	0.0507445950949374	0.991413740826212	0.897553329925359	1.09508947572036	0.865060469620047
IS	DKK1	Maximum likelihood	15	-0.00944958818152569	-0.0865784334826688	0.0676792571196174	0.0393514516842567	0.990594918875429	0.917063617470484	1.07002205147823	0.810227033358632
IS	DKK1	Simple median	15	-0.0484866294446077	-0.165971904171473	0.068998645282258	0.0599414666973805	0.952670076948714	0.847070032989471	1.07143475765569	0.418572889333086
IS	DKK1	Weighted median	15	-0.0527864491317959	-0.167632346613552	0.0620594483499599	0.058594845653957	0.948582561483839	0.845664689024551	1.06402559741396	0.367656440582883
IS	DKK1	Penalised weighted median	15	-0.0559256744996441	-0.165176889807793	0.0533255408085048	0.0557404159735454	0.945609416171554	0.847743733598087	1.05477296087715	0.315704755716044
IS	DKK1	Simple mode	15	-0.117260640853551	-0.322468624413947	0.0879473427068445	0.10469795079612	0.88935336113312	0.724358658627807	1.09193062240343	0.281564744685887
IS	DKK1	Weighted mode	15	-0.0901213030419049	-0.269999425895688	0.0897568198118779	0.0917745524764198	0.913820329362078	0.763379932596439	1.09390823454731	0.342773365280935
DKK1, dickkopf-1; CAD, coronary artery disease; IS, ischemic stroke.
