# Supplementary material for: Investigating the causal effect of Dickkopf-1 on coronary artery disease and ischemic stroke: a Mendelian randomization study
Source: Aging (Albany NY). 2023 Sep 22;15(18):9797–808. doi: 10.18632/aging.205050 (PMC10564415; doi:10.18632/aging.205050)
Supplement: Supplementary Table 7 [file aging-15-205050-s006.xls]

## Sheet: Sheet1
Supplementary Table 7. The results of MR-PRESSO analysis.
exposures	outcome	Main.MR.results.Exposure	Main.MR.results.MR.Analysis	Main.MR.results.Causal.Estimate	Main.MR.results.Sd	Main.MR.results.T.stat	Main.MR.results.P.value	MR.PRESSO.results.Global.Test.RSSobs	MR.PRESSO.results.Global.Test.Pvalue
DKK1	CAD	beta.exposure	Raw	0.083508443816135	0.0306490552507759	2.72466616451484	0.0134530919281768	23.6521931878801	0.345666666666667
DKK1	CAD	beta.exposure	Outlier-corrected	NA	NA	NA	NA	23.6521931878801	0.345666666666667
DKK1	IS	beta.exposure	Raw	0.091249071204544	0.0443528299359257	2.05734496167137	0.0516979802578498	27.0045133152042	0.329
DKK1	IS	beta.exposure	Outlier-corrected	NA	NA	NA	NA	27.0045133152042	0.329
DKK1, dickkopf-1; CAD, coronary artery disease; IS, ischemic stroke.
